# Supplementary material for: miR-122 removal in the liver activates imprinted microRNAs and enables more effective microRNA-mediated gene repression
Source: PubMed Central journal article supplement (PMC6294001; doi:10.1038/s41467-018-07786-7), 2018-12-14
Supplement: 41467_2018_7786_MOESM3_ESM.pdf [file 41467_2018_7786_MOESM3_ESM.pdf]

## **Description of Additional Supplementary Files**

File Name: Supplementary Data 1

Description: Normalized microRNA read counts for mouse liver samples

File Name: Supplementary Data 2

Description: RNA sequencing normalized FPKM values for mouse liver samples

File Name: Supplementary Data 3

Description: Differential expression of predicted targets of microRNAs in the mouse liver
